# Supplementary material for: Mesenchymal Stromal Cell Exosomes Mediate M2-like Macrophage Polarization through CD73/Ecto-5′-Nucleotidase Activity
Source: MDPI journal article supplement (doi:10.3390/pharmaceutics15051489), 2023-05-13
Supplement: s1 [file s1]

Supplementary materials

## Mesenchymal stromal cell exosomes mediate M2-like macrophage polarization through CD73/ecto-5'-nucleotidase activity

Kristeen Ye Wen Teo<sup>1,2</sup>, Shipin Zhang<sup>1,2</sup>, Jia Tong Loh<sup>3</sup>, Ruenn Chai Lai<sup>4</sup>, Hwee Weng Dennis Hey<sup>1</sup>, Kong-Peng Lam<sup>3</sup>, Sai Kiang Lim<sup>4</sup>, Wei Seong Toh<sup>1,2,5,6\*</sup>

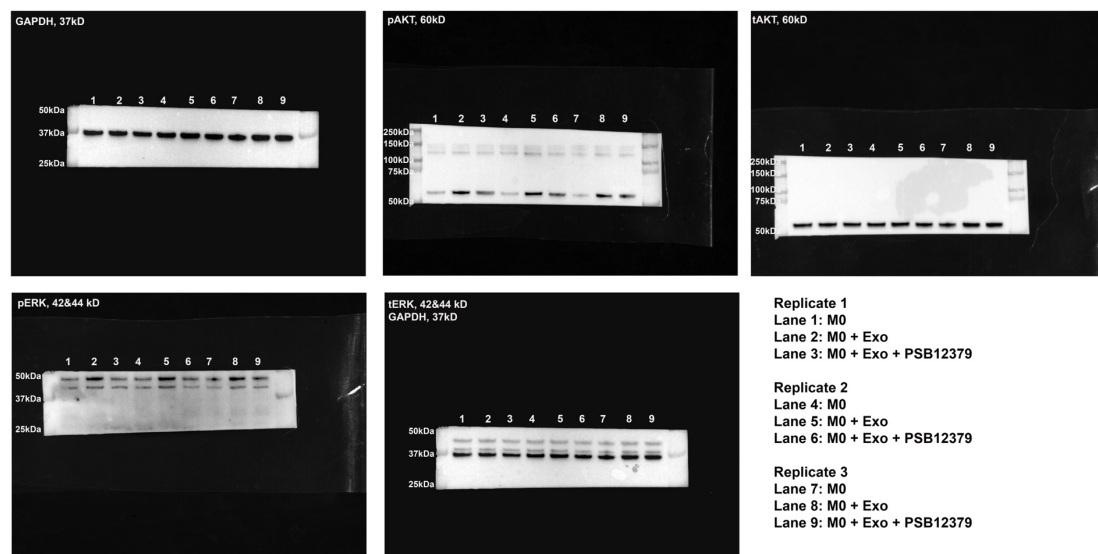

**Figure S1:** Individual blots for western blot analysis of AKT and ERK activation in primary macrophages treated with MSC exosomes in the presence or absence of CD73 inhibition by PSB12379.

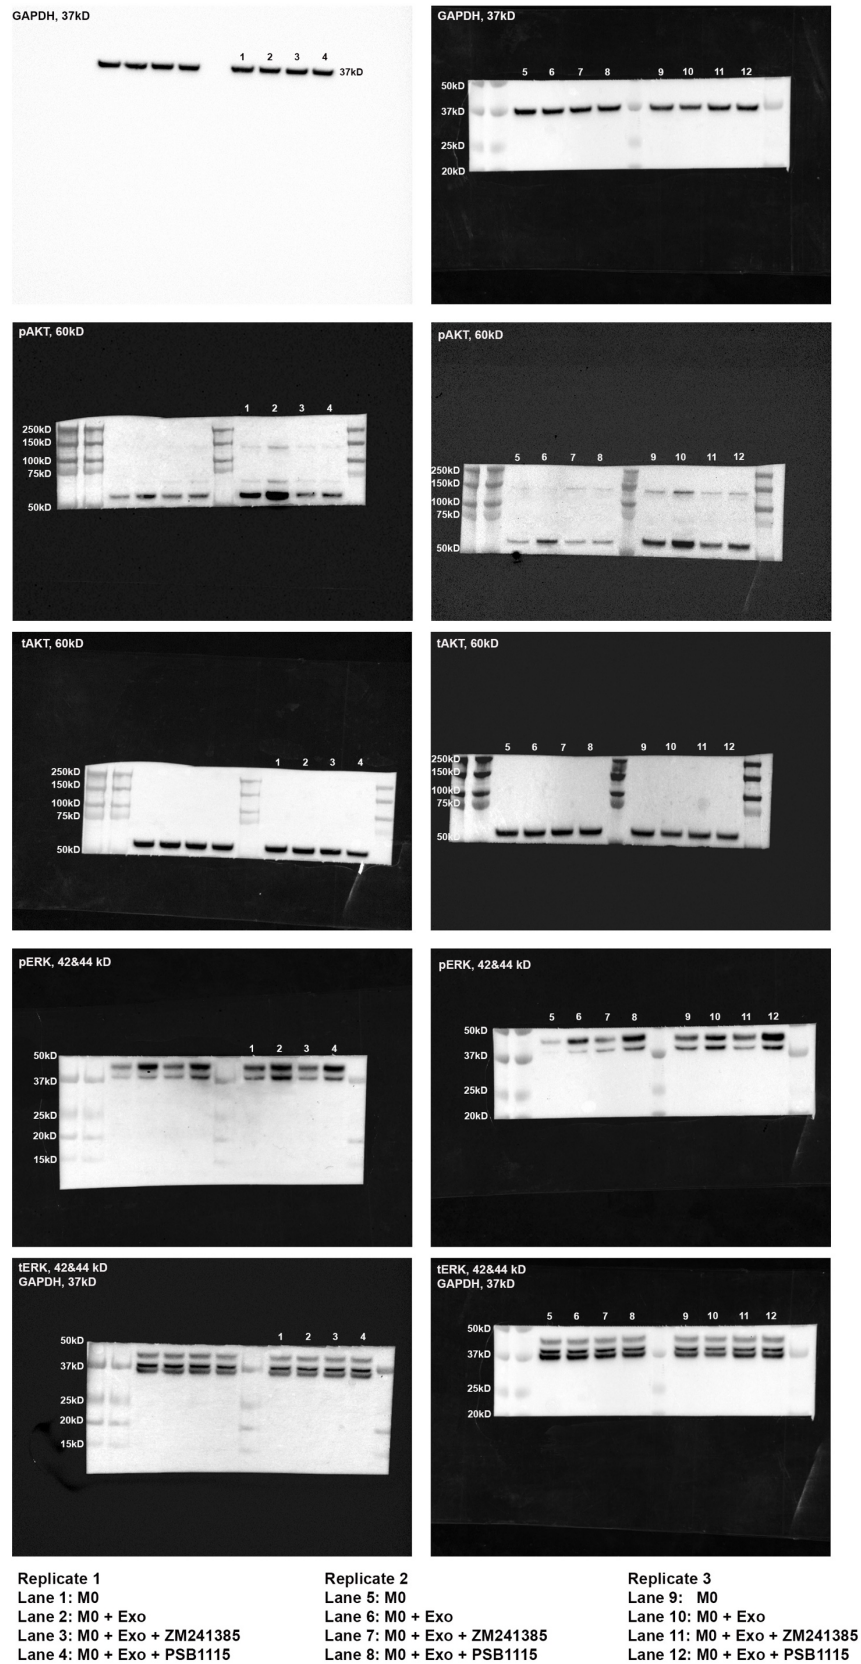

**Figure S2:** Individual blots for western blot analysis of AKT and ERK activation in primary macrophages pre-treated with A<sub>2A</sub> receptor inhibitor (ZM241385) and A<sub>2B</sub> receptor inhibitor (PSB1115) before exosome treatment.

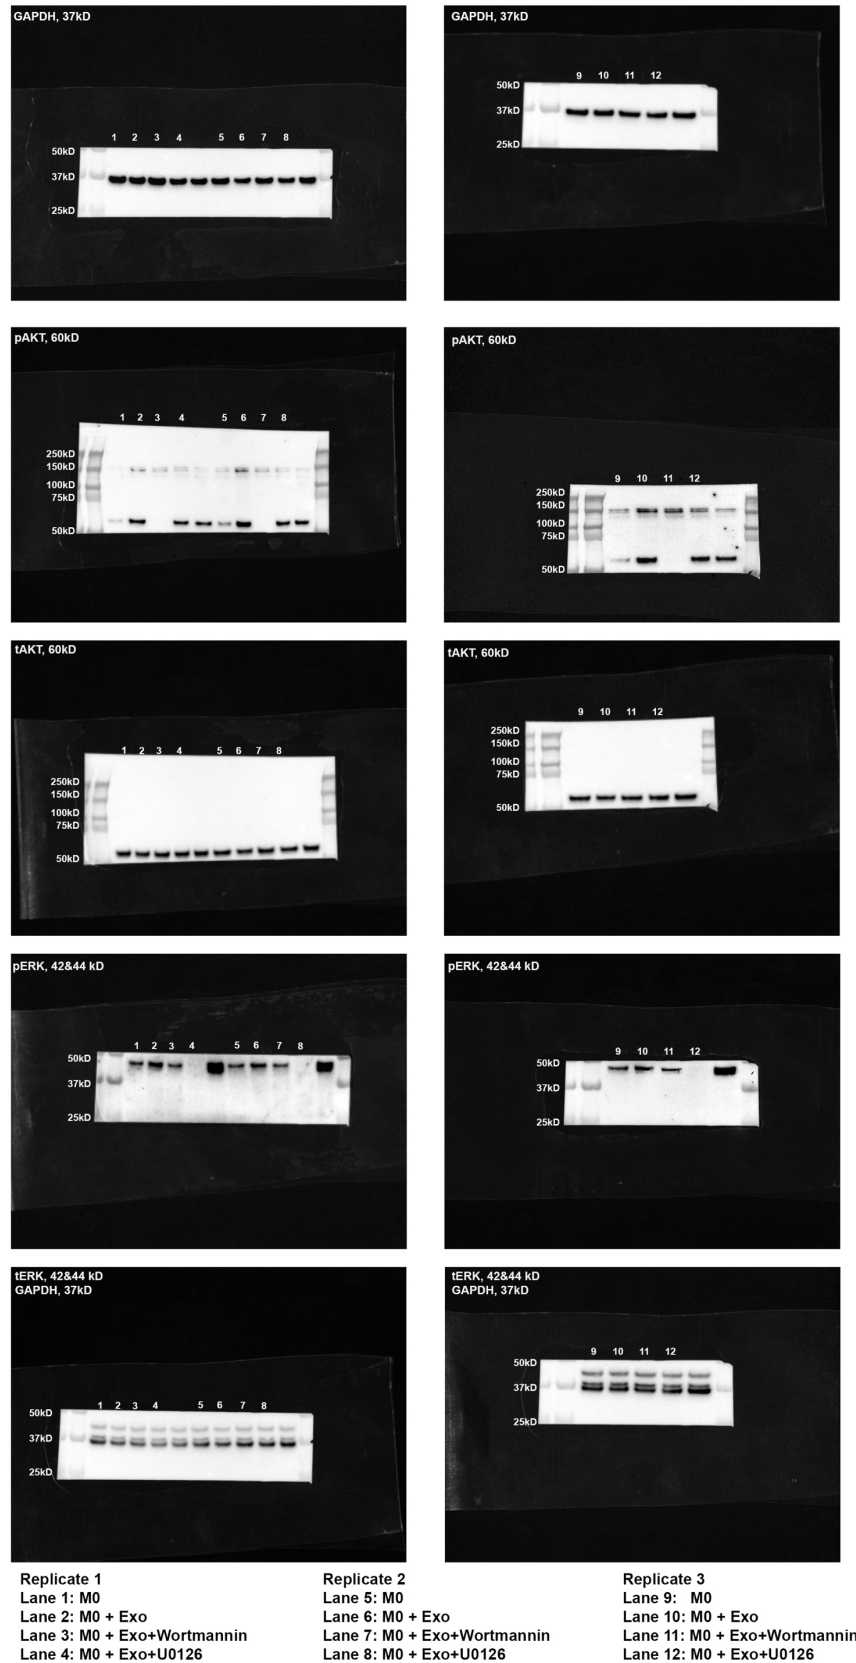

**Figure S3:** Individual blots for western blot analysis of AKT and ERK activation in primary macrophages pre-treated with AKT inhibitor (Wortmannin) and ERK inhibitor (U0126) before exosome treatment.
